# Supplementary material for: Cost-Effectiveness of Genotype-Guided Acenocoumarol Therapy in Atrial Fibrillation: A Pharmacogenomic Simulation Study in the Chilean Population
Source: Research Square preprint supplement (doi:10.21203/rs.3.rs-7411548/v1), 2025-09-01
Supplement: Supplementary file 1 [file 12d423da6476ce39755e7b82.docx]

**Supplementary Table 1**. Model transition values and input parameters for the cost-effectiveness analysis.

| **Parameter** | **Transition possibilities Value** | **Source** |
| --- | --- | --- |
| **Time spent in normal INR Range** | 57.7% | (Hylek *et al*, 2007) |
| **Absolute increase in normal INR Range due to genetically guided dosing** | 8.5% | (Anderson *et al*, 2007) |
| **Time spent in lower level of INR** | 22.2% | (Hylek *et al*, 2007) |
| **Time spent in high INR Range** | 11.2% | (Hylek *et al*, 2007) |
| **Probability of Suffering an Ischemic Stroke due to being on Lower INR Range** | 9.6% | (Hylek *et al,* 2003) |
| **Probability of Suffer a Haemorrhagic Stroke due to being on High INR Range** | 19.6% | (Hylek *et al*, 2003) |
| **Probability of Death after a Ischemic Stroke** | 52.2% | (Hylek *et al*, 2003) |
| **Probability of Death after a Haemorrhagic Stroke** | 9.33% | (Rockville, MD; 2003) |
| **Probability of Natural Death** | 2.465% | (INE, 2021) |
| **QALY generated at normal health** | 1.0 |  |
| **QALY generated after Ischemic Stroke** | 0.76 | (Gage *et al*, 1996) |
| **QALY generated after Haemorrhagic Stroke** | 0.76 | (Gage *et al*, 1996) |
| **Acenocoumarol Cost** | U$11.1 | (FONASAb, 2025.) |
| **Genetic Test Cost** | U$190 | (FONASAa, 2025.) |
| **Cost of Ischemic Stroke** | U$11.796 | Supersalud, 2025b |
| **Cost of Haemorrhagic Stroke** | U$1.604 | Supersalud, 2025a |

QALY: Quality-adjusted life years; INR: International Normalized Ratio
